# Supplementary material for: Facile enhancement of the durability and CO tolerance of CB/PtRu by poly(2,5-benzimidazole) coating via in situ polymerization
Source: Royal Society of Chemistry journal article supplement (doi:10.1039/c6ra22775a), 2016-01-01
Supplement: c6ra22775a1.pdf [file c6ra22775a1.pdf]

**Supporting Information  
for**

**Facile Enhancement in durability and CO tolerance of CB/PtRu by Poly(2,5-benzimidazole) Coating *via* In-situ Polymerization**

Zehui Yang<sup>a\*</sup>, Xinxin Yu<sup>a</sup> and Fang Luo<sup>b</sup>

<sup>a</sup>*Sustainable Energy Laboratory, Faculty of Materials Science and Chemistry, China University of Geosciences Wuhan, 388 Lumo RD, Wuhan, 430074, China*

<sup>b</sup>*School of Materials and Science, Hubei University of Technology, 28 Nanli RD, Wuhan, China*

To whom correspondence should be addressed:

Tel/Fax: +86 186-7237-4372; E-mail: yeungzehui@gmail.com

**Experimental**

**Materials**

Methanol, isopropanol, *N,N*-Dimethylacetamide (DMAc), 3,4-diaminobenzoic acid (DABA), sulphuric acid, and polyphosphoric acid (PPA) were purchased from Sinopharm Chemical Reagent Co., Ltd. The commercial CB/PtRu (Pt: 40 wt%, Ru: 20 wt%) and CB/Pt (40 wt%) electrocatalysts were purchased from Alfa Aesar. Nafion solution (5 wt%) were offered by Sigma-Aldrich. Aqueous solutions were prepared using Milli-Q water and all chemicals were used as received without further purification.

**Synthesis of CB/PtRu/ABPBI**

100 mg of CB/PtRu and 10 mg of DABA were mixed in 100 g of PPA by stirring, and then increase the temperature to 200 °C under stable N<sub>2</sub> follow and

the polymerization was terminated after 5 h. The resultant solution was condensed in Milli-Q water and NaOH was added to neutralize the solution to remove PPA. The composite was collected by filtration, washing with DMAc to remove monomer and dried at 80 °C under vacuum.

### **Gas diffusion electrode (GDE) preparation**

GDE was prepared as follows. Three different electrocatalysts were used to prepare GDEs for cathode sides. The electrocatalyst was dispersed in 20 mL of isopropanol aqueous solution ( $v/v=4:1$ ) by sonication for 30 min, and then filtered using gas diffusion layer (GDL) as filter paper. The Pt loading amount on the GDL was controlled at 2 mg cm<sup>-2</sup>. The obtained GDE was dried overnight under vacuum at 25 °C to remove isopropanol. The anode GDE was prepared using commercial CB/PtRu or synthesized CB/PtRu/ABPBI with 1 mg<sub>Pt</sub> cm<sup>-2</sup>.

### **Membrane electrode assembly (MEA) preparation**

MEA was prepared by hot pressing the prepared GDEs and Nafion 117 membrane. The geometrical area of the MEA was 5 cm<sup>2</sup>.

### **Characterization**

The XPS spectra were measured using an AXIS-ULTRA<sup>DLD</sup> (Shimadzu). The TGA measurements were conducted by an EXSTAR 6000, Seiko Inc. at the heating rate of 5 °C min<sup>-1</sup> under 100 mL min<sup>-1</sup> of air. The TEM micrographs were measured using a JEM-2010 (JEOL, acceleration voltage of 120 kV) electron microscope.

### **Electrochemical measurements**

The electrochemical measurements were performed using a glassy carbon electrode electrode attached to CHI640e potentiostat with a conventional three-electrode configuration in a vessel at room temperature. A GCE with a geometric surface area of 0.196 cm<sup>2</sup> was used as the working electrode. A Pt wire and an Ag/AgCl were used as the counter and reference electrodes, respectively. The catalyst ink was typically prepared as follows. The composites (1.0 mg) were ultrasonically dispersed in an 80% aqueous isopropanol solution (2.0 mL) to form a homogeneous suspension. A portion of the electrocatalyst suspension was then cast onto a GCE to form a uniform catalyst layer (the loading amount of Pt was controlled at 14 μg cm<sup>-2</sup>). Finally, the cast films on the electrodes were air-dried. The cyclic voltammetry (CV) measurements of the electrocatalysts at the scan rate of 50 mV s<sup>-1</sup> were carried in an N<sub>2</sub>-saturated 0.5 M H<sub>2</sub>SO<sub>4</sub> solution in order to determine the electrochemical surface area (ECSA) values.

### **Durability testing**

The Pt stability was tested using the protocol of the Fuel Cell Commercialization Conference of Japan (FCCJ) (measured in N<sub>2</sub>-saturated 0.5 M H<sub>2</sub>SO<sub>4</sub> at 25 °C), in which the potential was kept at 0.6 V vs. RHE for 3 s, then applied up to 1 V vs. RHE for another 3 s. The procedure was cycled, and the CV measurement was carried out after every 600 cycles (see Supporting Information, **Figure S1**).

### **CO stripping**

CO stripping voltammetry was performed by feeding the work electrode with CO gas for 10 min with flow rate of 100 mL min<sup>-1</sup>, while holding the working electrode potential at 0.2 V vs. RHE. After the adsorption, the CO was removed from electrode and changed to N<sub>2</sub> bubbling for 50 min. CO stripping voltammogram was recorded with scan rate of 50 mV s<sup>-1</sup>.

### **Methanol oxidation (MOR)**

The methanol oxidation reaction (MOR) was evaluated before and after the durability test using N<sub>2</sub>-saturated 1M methanol and 0.5 M H<sub>2</sub>SO<sub>4</sub> at the scan rate of 50 mV s<sup>-1</sup> at room temperature without rotation (The electrode was the same one used for the ECSA measurement. The Pt loading amount was controlled at 14 μg cm<sup>-2</sup>). Before the measurement, 50 cycles were carried out to active the catalyst.

### **Fuel cell test**

The FC performance of the fabricated MEAs was evaluated at 70 °C using a computer-controlled fuel cell testing system (Model 850e, Scribner Associate, Inc.). The polarization and power density curves were obtained at atmospheric pressure by flowing 1M methanol (flow rate= 3 mL min<sup>-1</sup>) and 100% humidified air (flow rate= 100 mL min<sup>-1</sup>) to the anode and cathode, respectively.

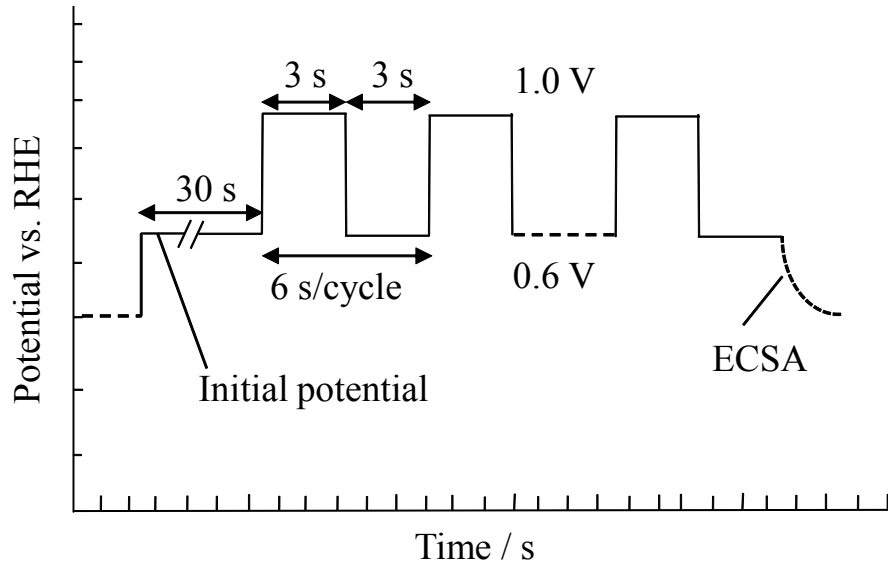

**Figure S1** New test protocol of the Pt stability test in half-cell proposed by the Fuel Cell Commercialization Conference of Japan (FCCJ).

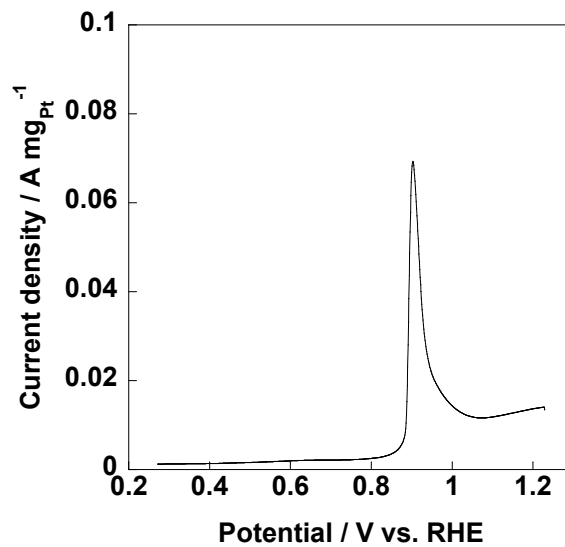

**Figure S2** CO stripping curve of commercial CB/Pt measured in N<sub>2</sub>-saturated 0.5 M H<sub>2</sub>SO<sub>4</sub> electrolyte.

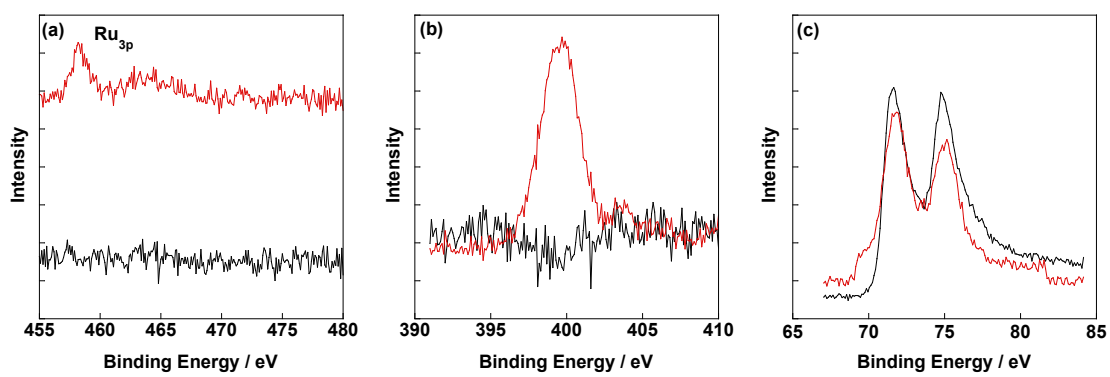

**Figure S3** XPS narrow scan in  $\text{Ru}_{3p}$  (a),  $\text{N}_{1s}$  (b),  $\text{Pt}_{4f}$  (c) and regions of CB/PtRu (black line) and CB/PtRu/ABPBI (red line) after durability test, respectively.

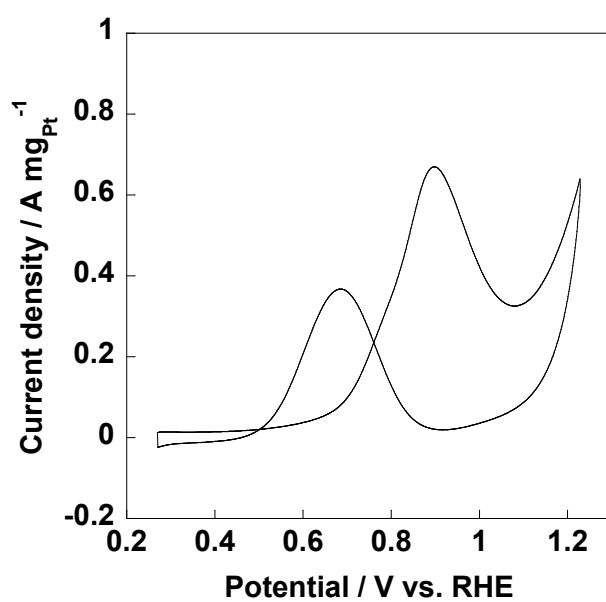

**Figure S4** MOR curve of commercial CB/Pt measured in  $\text{N}_2$ -saturated 0.5 M  $\text{H}_2\text{SO}_4$  with 1 M methanol in the electrolyte.
